# Supplementary material for: First-principles investigation on anion order, electronic structure and dielectric properties of BaTaO2N
Source: Royal Society of Chemistry journal article supplement (doi:10.1039/c9ta01690b), 2019-01-01
Supplement: c9ta01690b1.pdf [file c9ta01690b1.pdf]

# Supplementary Information: First-principles investigation on anion order, electronic structure and dielectric properties of $\text{BaTaO}_2\text{N}$

Xi Xu and Hong Jiang\*

May 23, 2019

Table S1: Cluster functions of 40-atom SQoS and SQS, compared with the target cluster correlation functions (CCFs) of the  $15 \times 15 \times 15$  supercell at  $T = 1300$  K and cluster correlation functions for the totally random state respectively.

| Index of two-body clusters | SQoS   | CCF(1300 K) | SQS   | CCF( $T = \infty$ ) |
|----------------------------|--------|-------------|-------|---------------------|
| 1                          | 0.042  | 0.050       | 0.083 | 0.111               |
| 2                          | -0.167 | -0.225      | 0.167 | 0.111               |
| 3                          | 0.083  | 0.081       | 0.000 | 0.111               |
| 4                          | 0.104  | 0.115       | 0.104 | 0.111               |
| 5                          | 0.125  | 0.125       | 0.083 | 0.111               |
| 6                          | 0.083  | 0.099       | 0.083 | 0.111               |

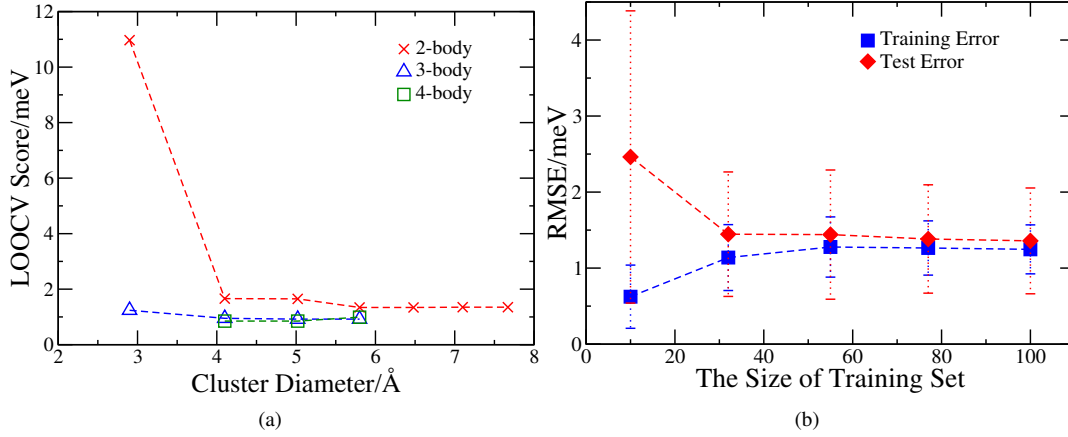

Figure S1: (a) The leave-one-out cross validation (LOOCV) scores with respect to different cluster expansion models. Candidates of cluster expansion models are generated by the following hierarchical approach: null and point clusters are always included. Two-body clusters are added step by step in terms of their diameters until the LOOCV score does not decrease significantly any more. Once two-body clusters are selected, three- and four-body clusters are added to the CE model in turn following the same procedure. Since the addition of three- and four-body clusters makes little difference, we adopt the cluster expansion model with one null cluster, one point cluster and six two-body clusters as our working model. (b) Learning curves for our working model with least-squares fitting of ECIs. Errors are in the unit of meV per atom. Training sets and test sets are generated by repeated 5-fold cross validation with the help of Scikit-learn code.[1]

Table S2: Zone-center ( $\mathbf{q} = 0$ ) optic phonon frequencies (unit:  $\text{cm}^{-1}$ ) for the three representative structures (MSC, SQoS and SQS).

|     | MSC   | SQoS  | SQS   |
|-----|-------|-------|-------|
| 1   | 79.06 | 48.34 | 71.26 |
| 2   | 81.58 | 61.62 | 76.94 |
| 3   | 85.57 | 67.88 | 82.98 |
| 4   | 86.59 | 76.15 | 83.97 |
| 5   | 87.51 | 81.29 | 90.51 |
| 6   | 89.10 | 87.62 | 93.82 |
| ... | ...   | ...   | ...   |

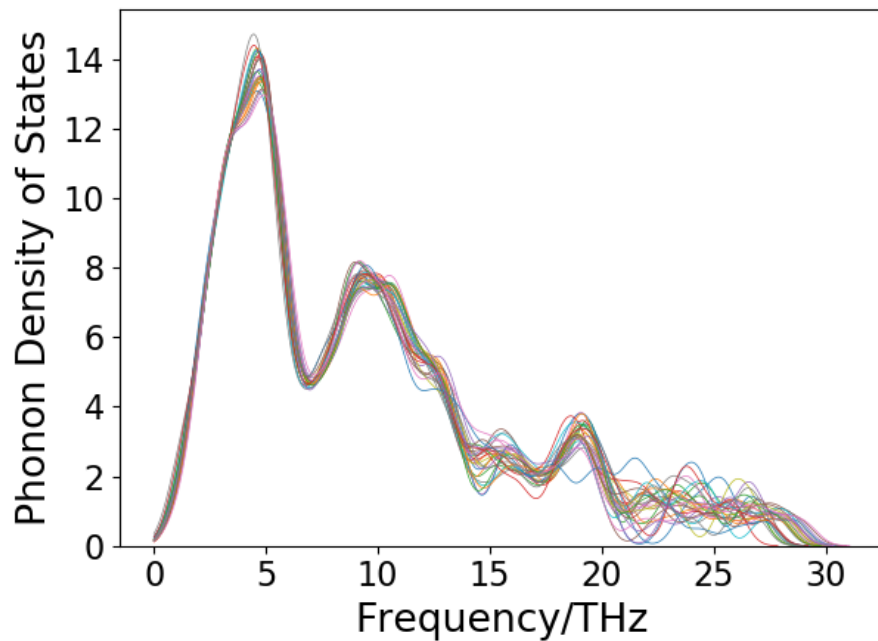

Figure S2: The phonon density of states for the 28 structures used in the cluster expansion of the free energy. No imaginary frequency is found for any structures.

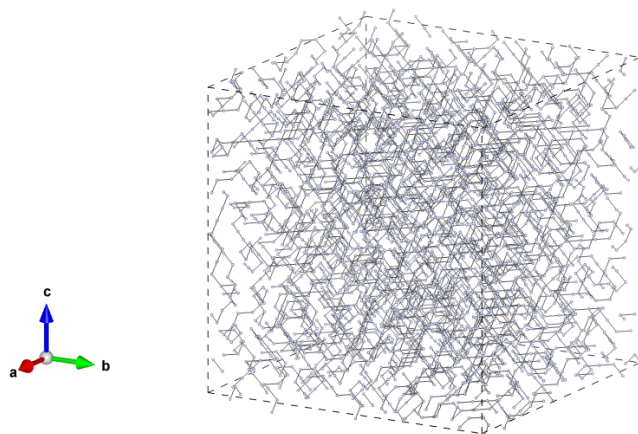

Figure S3: A snapshot from Monte Carlo simulations of the  $15 \times 15 \times 15$  supercell of  $\text{BaTaO}_2\text{N}$  at  $T = 300$  K. N atoms are represented by small blue balls and O atoms are omitted for clarity. Two N atoms in the adjacent positions are connected by a grey bond. It can be seen that N atoms are distributed almost uniformly and most octahedra take the *cis* configuration.

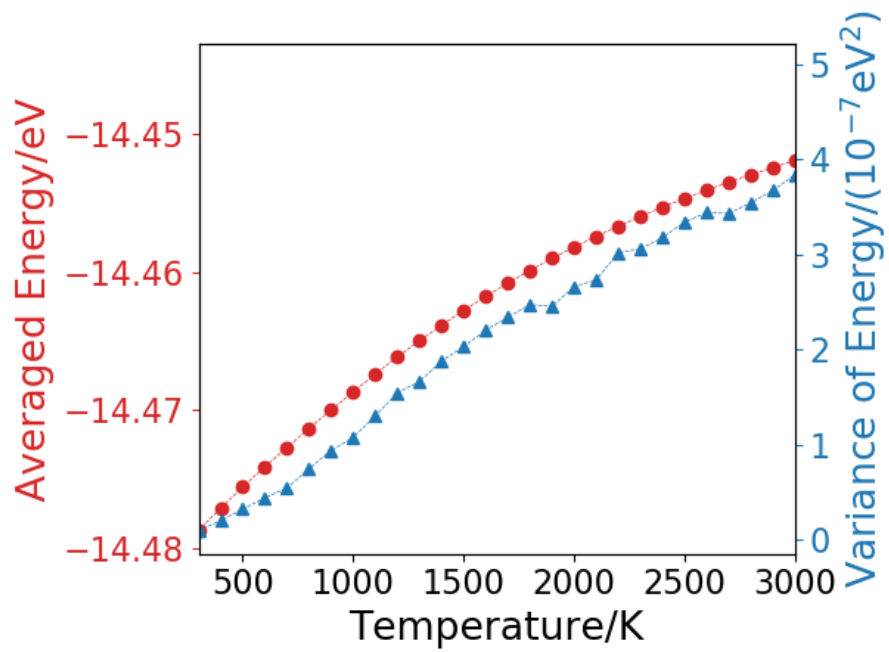

Figure S4: The ensemble averaged energy and its variance from Monte Carlo simulations of the  $15 \times 15 \times 15$  supercell of  $\text{BaTaO}_2\text{N}$  at different temperatures. Both increase “continuously” as the temperature rises, indicating that there is no sign for first-order or second order phase change at the range of considered temperatures.

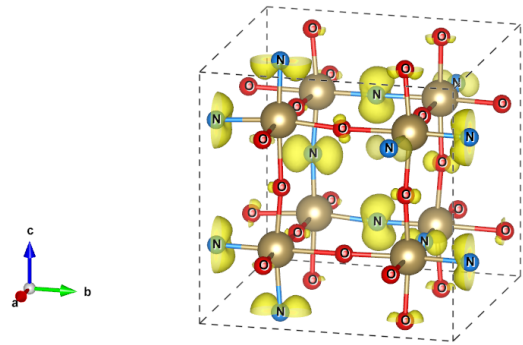

(a) MSC

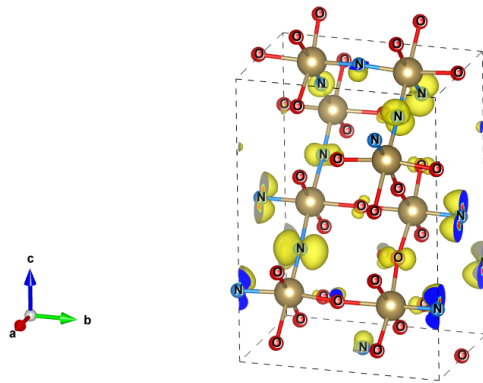

(b) SQoS

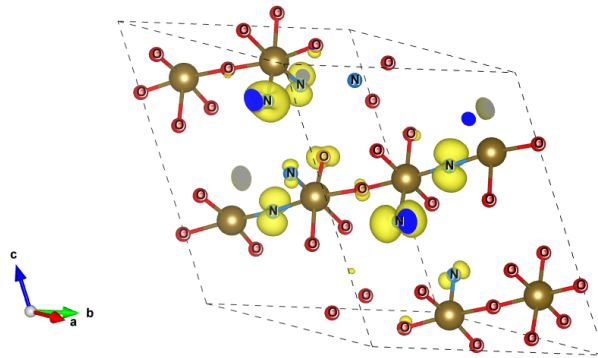

(c) SQS

Figure S5: Decomposed charge density at the valance band maximum of MSC, SQoS and SQS. Ta atoms are shown by large brown balls. O and N atoms are represented by red and blue small balls respectively. Ba atoms are omitted for their negligible contributions.

## References

- [1] F. Pedregosa, G. Varoquaux, A. Gramfort, V. Michel, B. Thirion, O. Grisel, M. Blondel, P. Prettenhofer, R. Weiss, V. Dubourg, J. Vanderplas, A. Passos, D. Cournapeau, M. Brucher, M. Perrot and E. Duchesnay *J. Mach. Learn. Res.*, **2011**, 12, 2825–2830.
